# Supplementary material for: Predictions of flavonoid solubility in ionic liquids by COSMO-RS: experimental verification, structural elucidation, and solvation characterization
Source: Royal Society of Chemistry journal article supplement (doi:10.1039/b709786g), 2007-01-01

## Supplementary information

### Molecular structures of the anions of ILs evaluated in this work (corresponding to Table 1)

| Group I                               |                     | Group II                       |                     | Group III                           |                     |
|---------------------------------------|---------------------|--------------------------------|---------------------|-------------------------------------|---------------------|
| Anion types                           | Molecular structure | Anion types                    | Molecular structure | Anion types                         | Molecular structure |
| acetate                               |                     | ethylsulfate                   |                     | bis(trifluoromethyl)imide           |                     |
| decanoate                             |                     | octylsulfate                   |                     | bis(trifluoromethylsulfonyl)methane |                     |
| bis(2,4,4-trimethylpentyl)phosphinate |                     | butylsulfate                   |                     | clo4                                |                     |
| cl                                    | $\text{Cl}^\ominus$ | methylsulfate                  |                     | tetracyanoborate                    |                     |
| Dihydricphosphate                     |                     | dicyanamide                    |                     | bisoxalatoborate                    |                     |
| dimethylphosphate                     |                     | Bisbiphenyldiolatoborate       |                     | BF4                                 |                     |
| Br                                    | $\text{Br}^\ominus$ | bispentafluoroethylphosphinate |                     | tf2N                                |                     |

---

toluene-4-sulfonate

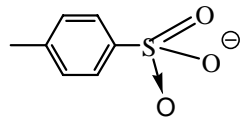

bissalicylatoborate

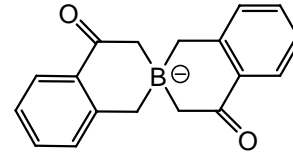

tris(nonafluorobutyl)trifluorophosphate

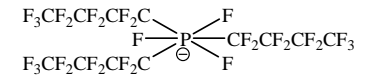

ethoxyethylsulfate

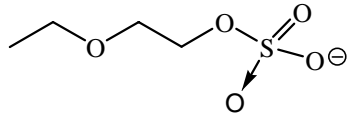

bismalonatoborate

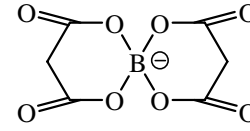

tris(pentafluoroethyl)trifluorophosphate

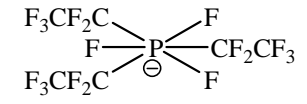

methoxyethylsulfate

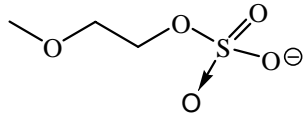

trifluoromethane-sulfonate

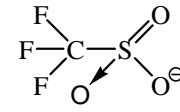

PF6

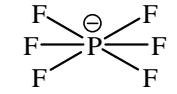

trifluoroacetate

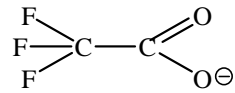

nitrate

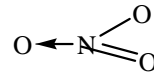

Supplement: b709786g.pdf [file b709786g.pdf]
